# Supplementary material for: Smokers are less likely than non-smokers to seek help for a lung cancer ‘alarm’ symptom
Source: PubMed Central journal article supplement (PMC4941149; doi:10.1136/thoraxjnl-2015-208063), 2016-02-24
Supplement: thoraxjnl-2015-208063supp.pdf [file thoraxjnl-2015-208063supp.pdf]

Participant number:

# HEALTH SURVEY

**Thank you for agreeing to complete this survey.**

- It should take no longer than 20 minutes to complete. You may, however, take as long as you wish.
- Your answers will be sent directly to the research team at University College London (UCL) and will be treated in strict confidence. No individual responses will be seen by the General Practitioner (GP).
- Please return the survey in the freepost envelope (no stamp required). By returning the survey you are consenting to take part in the study.

If you have any difficulties completing this survey or have any questions about it, please call **020 7679 1735**

**Thank you**

# FIRST, SOME QUESTIONS ABOUT YOUR VIEWS ON GOING TO SEE THE GP

The following statements are things some people say about visiting the GP. Next to EACH STATEMENT, please tick the box that best reflects your level of agreement.

*The GP will NOT be made aware of your individual responses. Your answers will be sent directly to the UCL research team.*

|                                                                                      | Strongly disagree        | Slightly disagree        | Neither agree or disagree | Slightly agree           | Strongly agree           |
|--------------------------------------------------------------------------------------|--------------------------|--------------------------|---------------------------|--------------------------|--------------------------|
| I would feel confident discussing any type of symptom with the GP                    | <input type="checkbox"/> | <input type="checkbox"/> | <input type="checkbox"/>  | <input type="checkbox"/> | <input type="checkbox"/> |
| I feel embarrassed talking to the GP about my symptoms                               | <input type="checkbox"/> | <input type="checkbox"/> | <input type="checkbox"/>  | <input type="checkbox"/> | <input type="checkbox"/> |
| Visiting the GP with symptoms that may not be serious is a waste of my time          | <input type="checkbox"/> | <input type="checkbox"/> | <input type="checkbox"/>  | <input type="checkbox"/> | <input type="checkbox"/> |
| It is difficult to make an appointment with the GP                                   | <input type="checkbox"/> | <input type="checkbox"/> | <input type="checkbox"/>  | <input type="checkbox"/> | <input type="checkbox"/> |
| If I thought a symptom might be serious, I would be too scared to see the GP         | <input type="checkbox"/> | <input type="checkbox"/> | <input type="checkbox"/>  | <input type="checkbox"/> | <input type="checkbox"/> |
| I spend time "scanning" my body for changes.                                         | <input type="checkbox"/> | <input type="checkbox"/> | <input type="checkbox"/>  | <input type="checkbox"/> | <input type="checkbox"/> |
| I have lots of things (other than my health) to worry about                          | <input type="checkbox"/> | <input type="checkbox"/> | <input type="checkbox"/>  | <input type="checkbox"/> | <input type="checkbox"/> |
| It is difficult for me to arrange transport to the GP's surgery                      | <input type="checkbox"/> | <input type="checkbox"/> | <input type="checkbox"/>  | <input type="checkbox"/> | <input type="checkbox"/> |
| It is a waste of the GP's time to see patients with symptoms that may not be serious | <input type="checkbox"/> | <input type="checkbox"/> | <input type="checkbox"/>  | <input type="checkbox"/> | <input type="checkbox"/> |
| I am too busy to make time to visit the GP                                           | <input type="checkbox"/> | <input type="checkbox"/> | <input type="checkbox"/>  | <input type="checkbox"/> | <input type="checkbox"/> |
| The GP gives me the opportunity to ask questions                                     | <input type="checkbox"/> | <input type="checkbox"/> | <input type="checkbox"/>  | <input type="checkbox"/> | <input type="checkbox"/> |
| I am very sensitive to changes in my body.                                           | <input type="checkbox"/> | <input type="checkbox"/> | <input type="checkbox"/>  | <input type="checkbox"/> | <input type="checkbox"/> |
| The GP encourages me to mention all my health concerns during the consultation       | <input type="checkbox"/> | <input type="checkbox"/> | <input type="checkbox"/>  | <input type="checkbox"/> | <input type="checkbox"/> |
| The GP is difficult to talk to                                                       | <input type="checkbox"/> | <input type="checkbox"/> | <input type="checkbox"/>  | <input type="checkbox"/> | <input type="checkbox"/> |
| I worry about what the GP might find                                                 | <input type="checkbox"/> | <input type="checkbox"/> | <input type="checkbox"/>  | <input type="checkbox"/> | <input type="checkbox"/> |
| I pay close attention to changes in my body                                          | <input type="checkbox"/> | <input type="checkbox"/> | <input type="checkbox"/>  | <input type="checkbox"/> | <input type="checkbox"/> |

**Approximately how many times have you been to see the GP in the last 3 months?**

Have not been

Once

Twice

Three or more times

**Generally speaking, do you think that most people your age visit the GP...**

Less often than they should

About as often as they should

More often than they should

**Compared with other people your age, do you think that you visit the GP...**

Less often than most people

About the same as most people

More often than most people

# THESE QUESTIONS ARE ABOUT YOUR EXPERIENCE OF SYMPTOMS IN THE LAST 3 MONTHS.

*Please note: If you experience symptoms persistently (i.e. they don't go away), you should go to your GP for advice.*

| In the last 3 months, have you had the following....?<br><br><i>Please answer yes or no for each symptom</i>                                        | Approximately when did the symptom start/when did you first notice it?<br><br>(Please give your best guess)                                                                                                                                                                                               | How long did the symptom last?                                                | Have you been concerned the symptom might be serious?                                                                                                                                             | How much has the symptom interfered with your life?                                                                                                                                               | What do <u>you</u> think may have caused the symptom?<br><br>(Please list as many things as come to mind) | Approximately how long after the symptom began did you contact the GP about it?<br><br>(If you are unsure, please give your best guess)                                                                                                                                                                                                                                                                                                                   |
|-----------------------------------------------------------------------------------------------------------------------------------------------------|-----------------------------------------------------------------------------------------------------------------------------------------------------------------------------------------------------------------------------------------------------------------------------------------------------------|-------------------------------------------------------------------------------|---------------------------------------------------------------------------------------------------------------------------------------------------------------------------------------------------|---------------------------------------------------------------------------------------------------------------------------------------------------------------------------------------------------|-----------------------------------------------------------------------------------------------------------|-----------------------------------------------------------------------------------------------------------------------------------------------------------------------------------------------------------------------------------------------------------------------------------------------------------------------------------------------------------------------------------------------------------------------------------------------------------|
| <b>Unexplained weight loss</b><br><input type="checkbox"/> YES →<br><br><input type="checkbox"/> NO                                                 | <input type="checkbox"/> Less than 1 week ago<br><input type="checkbox"/> Less than 2 weeks ago<br><input type="checkbox"/> Less than 1 month ago<br><input type="checkbox"/> Less than 6 weeks ago<br><input type="checkbox"/> Less than 3 months ago<br><input type="checkbox"/> 3 months ago or longer | Number of days:<br>_____ days<br><br>Or:<br><input type="checkbox"/> On-going | <input type="checkbox"/> Not at all<br><input type="checkbox"/> A little bit<br><input type="checkbox"/> Moderately<br><input type="checkbox"/> Quite a bit<br><input type="checkbox"/> Extremely | <input type="checkbox"/> Not at all<br><input type="checkbox"/> A little bit<br><input type="checkbox"/> Moderately<br><input type="checkbox"/> Quite a bit<br><input type="checkbox"/> Extremely | _____<br>_____<br>_____<br>_____                                                                          | <input type="checkbox"/> Did not contact the GP<br><input type="checkbox"/> Not contacted the GP yet, but plan to<br><input type="checkbox"/> Within 1-2 weeks of noticing symptom<br><input type="checkbox"/> Within 1 month of noticing symptom<br><input type="checkbox"/> Within 6 weeks of noticing symptom<br><input type="checkbox"/> Within 3 months of noticing symptom<br><input type="checkbox"/> After more than 3 months of noticing symptom |
| <b>Unexplained lump</b><br><input type="checkbox"/> YES →<br><br><input type="checkbox"/> NO                                                        | <input type="checkbox"/> Less than 1 week ago<br><input type="checkbox"/> Less than 2 weeks ago<br><input type="checkbox"/> Less than 1 month ago<br><input type="checkbox"/> Less than 6 weeks ago<br><input type="checkbox"/> Less than 3 months ago<br><input type="checkbox"/> 3 months ago or longer | Number of days:<br>_____ days<br><br>Or:<br><input type="checkbox"/> On-going | <input type="checkbox"/> Not at all<br><input type="checkbox"/> A little bit<br><input type="checkbox"/> Moderately<br><input type="checkbox"/> Quite a bit<br><input type="checkbox"/> Extremely | <input type="checkbox"/> Not at all<br><input type="checkbox"/> A little bit<br><input type="checkbox"/> Moderately<br><input type="checkbox"/> Quite a bit<br><input type="checkbox"/> Extremely | _____<br>_____<br>_____<br>_____                                                                          | <input type="checkbox"/> Did not contact the GP<br><input type="checkbox"/> Not contacted the GP yet, but plan to<br><input type="checkbox"/> Within 1-2 weeks of noticing symptom<br><input type="checkbox"/> Within 1 month of noticing symptom<br><input type="checkbox"/> Within 6 weeks of noticing symptom<br><input type="checkbox"/> Within 3 months of noticing symptom<br><input type="checkbox"/> After more than 3 months of noticing symptom |
| <b>Change in the appearance of a mole or a new mole</b><br><input type="checkbox"/> YES →<br><br><input type="checkbox"/> NO                        | <input type="checkbox"/> Less than 1 week ago<br><input type="checkbox"/> Less than 2 weeks ago<br><input type="checkbox"/> Less than 1 month ago<br><input type="checkbox"/> Less than 6 weeks ago<br><input type="checkbox"/> Less than 3 months ago<br><input type="checkbox"/> 3 months ago or longer | Number of days:<br>_____ days<br><br>Or:<br><input type="checkbox"/> On-going | <input type="checkbox"/> Not at all<br><input type="checkbox"/> A little bit<br><input type="checkbox"/> Moderately<br><input type="checkbox"/> Quite a bit<br><input type="checkbox"/> Extremely | <input type="checkbox"/> Not at all<br><input type="checkbox"/> A little bit<br><input type="checkbox"/> Moderately<br><input type="checkbox"/> Quite a bit<br><input type="checkbox"/> Extremely | _____<br>_____<br>_____<br>_____                                                                          | <input type="checkbox"/> Did not contact the GP<br><input type="checkbox"/> Not contacted the GP yet, but plan to<br><input type="checkbox"/> Within 1-2 weeks of noticing symptom<br><input type="checkbox"/> Within 1 month of noticing symptom<br><input type="checkbox"/> Within 6 weeks of noticing symptom<br><input type="checkbox"/> Within 3 months of noticing symptom<br><input type="checkbox"/> After more than 3 months of noticing symptom |
| <b>Persistent change in bowel habits</b><br>(persistent means doesn't go away)<br><input type="checkbox"/> YES →<br><br><input type="checkbox"/> NO | <input type="checkbox"/> Less than 1 week ago<br><input type="checkbox"/> Less than 2 weeks ago<br><input type="checkbox"/> Less than 1 month ago<br><input type="checkbox"/> Less than 6 weeks ago<br><input type="checkbox"/> Less than 3 months ago<br><input type="checkbox"/> 3 months ago or longer | Number of days:<br>_____ days<br><br>Or:<br><input type="checkbox"/> On-going | <input type="checkbox"/> Not at all<br><input type="checkbox"/> A little bit<br><input type="checkbox"/> Moderately<br><input type="checkbox"/> Quite a bit<br><input type="checkbox"/> Extremely | <input type="checkbox"/> Not at all<br><input type="checkbox"/> A little bit<br><input type="checkbox"/> Moderately<br><input type="checkbox"/> Quite a bit<br><input type="checkbox"/> Extremely | _____<br>_____<br>_____<br>_____                                                                          | <input type="checkbox"/> Did not contact the GP<br><input type="checkbox"/> Not contacted the GP yet, but plan to<br><input type="checkbox"/> Within 1-2 weeks of noticing symptom<br><input type="checkbox"/> Within 1 month of noticing symptom<br><input type="checkbox"/> Within 6 weeks of noticing symptom<br><input type="checkbox"/> Within 3 months of noticing symptom<br><input type="checkbox"/> After more than 3 months of noticing symptom |

| <p>In the last 3 months, have you had the following....?<br/><i>*Please answer for each symptom*</i></p>                   | <p>Approximately when did the symptom start/when did you first notice it?<br/>(Please give your best guess)</p>                                                                                                                                                                                                            | <p>How long did the symptom last?</p>                                                  | <p>Have you been concerned the symptom might be serious?</p>                                                                                                                                                     | <p>How much has the symptom interfered with your life?</p>                                                                                                                                                       | <p>What do <u>you</u> think may have caused the symptom?<br/>(Please list as many things as come to mind)</p> | <p>Approximately how long after the symptom began did you contact the GP about it?<br/>(If you are unsure, please give your best guess)</p>                                                                                                                                                                                                                                                                                                                                  |
|----------------------------------------------------------------------------------------------------------------------------|----------------------------------------------------------------------------------------------------------------------------------------------------------------------------------------------------------------------------------------------------------------------------------------------------------------------------|----------------------------------------------------------------------------------------|------------------------------------------------------------------------------------------------------------------------------------------------------------------------------------------------------------------|------------------------------------------------------------------------------------------------------------------------------------------------------------------------------------------------------------------|---------------------------------------------------------------------------------------------------------------|------------------------------------------------------------------------------------------------------------------------------------------------------------------------------------------------------------------------------------------------------------------------------------------------------------------------------------------------------------------------------------------------------------------------------------------------------------------------------|
| <p><b>Blood in urine</b></p> <p><input type="checkbox"/> YES →</p> <p><input type="checkbox"/> NO</p>                      | <p><input type="checkbox"/> Less than 1 week ago<br/> <input type="checkbox"/> Less than 2 weeks ago<br/> <input type="checkbox"/> Less than 1 month ago<br/> <input type="checkbox"/> Less than 6 weeks ago<br/> <input type="checkbox"/> Less than 3 months ago<br/> <input type="checkbox"/> 3 months ago or longer</p> | <p>Number of days:<br/>_____ days</p> <p>Or:<br/><input type="checkbox"/> On-going</p> | <p><input type="checkbox"/> Not at all<br/> <input type="checkbox"/> A little bit<br/> <input type="checkbox"/> Moderately<br/> <input type="checkbox"/> Quite a bit<br/> <input type="checkbox"/> Extremely</p> | <p><input type="checkbox"/> Not at all<br/> <input type="checkbox"/> A little bit<br/> <input type="checkbox"/> Moderately<br/> <input type="checkbox"/> Quite a bit<br/> <input type="checkbox"/> Extremely</p> | <p>_____</p> <p>_____</p> <p>_____</p> <p>_____</p>                                                           | <p><input type="checkbox"/> Did not contact the GP<br/> <input type="checkbox"/> Not contacted the GP yet, but plan to<br/> <input type="checkbox"/> Within 1-2 weeks of noticing symptom<br/> <input type="checkbox"/> Within 1 month of noticing symptom<br/> <input type="checkbox"/> Within 6 weeks of noticing symptom<br/> <input type="checkbox"/> Within 3 months of noticing symptom<br/> <input type="checkbox"/> After more than 3 months of noticing symptom</p> |
| <p><b>Persistent change in bladder habits</b></p> <p><input type="checkbox"/> YES →</p> <p><input type="checkbox"/> NO</p> | <p><input type="checkbox"/> Less than 1 week ago<br/> <input type="checkbox"/> Less than 2 weeks ago<br/> <input type="checkbox"/> Less than 1 month ago<br/> <input type="checkbox"/> Less than 6 weeks ago<br/> <input type="checkbox"/> Less than 3 months ago<br/> <input type="checkbox"/> 3 months ago or longer</p> | <p>Number of days:<br/>_____ days</p> <p>Or:<br/><input type="checkbox"/> On-going</p> | <p><input type="checkbox"/> Not at all<br/> <input type="checkbox"/> A little bit<br/> <input type="checkbox"/> Moderately<br/> <input type="checkbox"/> Quite a bit<br/> <input type="checkbox"/> Extremely</p> | <p><input type="checkbox"/> Not at all<br/> <input type="checkbox"/> A little bit<br/> <input type="checkbox"/> Moderately<br/> <input type="checkbox"/> Quite a bit<br/> <input type="checkbox"/> Extremely</p> | <p>_____</p> <p>_____</p> <p>_____</p> <p>_____</p>                                                           | <p><input type="checkbox"/> Did not contact the GP<br/> <input type="checkbox"/> Not contacted the GP yet, but plan to<br/> <input type="checkbox"/> Within 1-2 weeks of noticing symptom<br/> <input type="checkbox"/> Within 1 month of noticing symptom<br/> <input type="checkbox"/> Within 6 weeks of noticing symptom<br/> <input type="checkbox"/> Within 3 months of noticing symptom<br/> <input type="checkbox"/> After more than 3 months of noticing symptom</p> |
| <p><b>Any breast changes</b></p> <p><input type="checkbox"/> YES →</p> <p><input type="checkbox"/> NO</p>                  | <p><input type="checkbox"/> Less than 1 week ago<br/> <input type="checkbox"/> Less than 2 weeks ago<br/> <input type="checkbox"/> Less than 1 month ago<br/> <input type="checkbox"/> Less than 6 weeks ago<br/> <input type="checkbox"/> Less than 3 months ago<br/> <input type="checkbox"/> 3 months ago or longer</p> | <p>Number of days:<br/>_____ days</p> <p>Or:<br/><input type="checkbox"/> On-going</p> | <p><input type="checkbox"/> Not at all<br/> <input type="checkbox"/> A little bit<br/> <input type="checkbox"/> Moderately<br/> <input type="checkbox"/> Quite a bit<br/> <input type="checkbox"/> Extremely</p> | <p><input type="checkbox"/> Not at all<br/> <input type="checkbox"/> A little bit<br/> <input type="checkbox"/> Moderately<br/> <input type="checkbox"/> Quite a bit<br/> <input type="checkbox"/> Extremely</p> | <p>_____</p> <p>_____</p> <p>_____</p> <p>_____</p>                                                           | <p><input type="checkbox"/> Did not contact the GP<br/> <input type="checkbox"/> Not contacted the GP yet, but plan to<br/> <input type="checkbox"/> Within 1-2 weeks of noticing symptom<br/> <input type="checkbox"/> Within 1 month of noticing symptom<br/> <input type="checkbox"/> Within 6 weeks of noticing symptom<br/> <input type="checkbox"/> Within 3 months of noticing symptom<br/> <input type="checkbox"/> After more than 3 months of noticing symptom</p> |
| <p><b>Persistent unexplained pain</b></p> <p><input type="checkbox"/> YES →</p> <p><input type="checkbox"/> NO</p>         | <p><input type="checkbox"/> Less than 1 week ago<br/> <input type="checkbox"/> Less than 2 weeks ago<br/> <input type="checkbox"/> Less than 1 month ago<br/> <input type="checkbox"/> Less than 6 weeks ago<br/> <input type="checkbox"/> Less than 3 months ago<br/> <input type="checkbox"/> 3 months ago or longer</p> | <p>Number of days:<br/>_____ days</p> <p>Or:<br/><input type="checkbox"/> On-going</p> | <p><input type="checkbox"/> Not at all<br/> <input type="checkbox"/> A little bit<br/> <input type="checkbox"/> Moderately<br/> <input type="checkbox"/> Quite a bit<br/> <input type="checkbox"/> Extremely</p> | <p><input type="checkbox"/> Not at all<br/> <input type="checkbox"/> A little bit<br/> <input type="checkbox"/> Moderately<br/> <input type="checkbox"/> Quite a bit<br/> <input type="checkbox"/> Extremely</p> | <p>_____</p> <p>_____</p> <p>_____</p> <p>_____</p>                                                           | <p><input type="checkbox"/> Did not contact the GP<br/> <input type="checkbox"/> Not contacted the GP yet, but plan to<br/> <input type="checkbox"/> Within 1-2 weeks of noticing symptom<br/> <input type="checkbox"/> Within 1 month of noticing symptom<br/> <input type="checkbox"/> Within 6 weeks of noticing symptom<br/> <input type="checkbox"/> Within 3 months of noticing symptom<br/> <input type="checkbox"/> After more than 3 months of noticing symptom</p> |
| <p><b>Persistent difficulty swallowing</b></p> <p><input type="checkbox"/> YES →</p> <p><input type="checkbox"/> NO</p>    | <p><input type="checkbox"/> Less than 1 week ago<br/> <input type="checkbox"/> Less than 2 weeks ago<br/> <input type="checkbox"/> Less than 1 month ago<br/> <input type="checkbox"/> Less than 6 weeks ago<br/> <input type="checkbox"/> Less than 3 months ago<br/> <input type="checkbox"/> 3 months ago or longer</p> | <p>Number of days:<br/>_____ days</p> <p>Or:<br/><input type="checkbox"/> On-going</p> | <p><input type="checkbox"/> Not at all<br/> <input type="checkbox"/> A little bit<br/> <input type="checkbox"/> Moderately<br/> <input type="checkbox"/> Quite a bit<br/> <input type="checkbox"/> Extremely</p> | <p><input type="checkbox"/> Not at all<br/> <input type="checkbox"/> A little bit<br/> <input type="checkbox"/> Moderately<br/> <input type="checkbox"/> Quite a bit<br/> <input type="checkbox"/> Extremely</p> | <p>_____</p> <p>_____</p> <p>_____</p> <p>_____</p>                                                           | <p><input type="checkbox"/> Did not contact the GP<br/> <input type="checkbox"/> Not contacted the GP yet, but plan to<br/> <input type="checkbox"/> Within 1-2 weeks of noticing symptom<br/> <input type="checkbox"/> Within 1 month of noticing symptom<br/> <input type="checkbox"/> Within 6 weeks of noticing symptom<br/> <input type="checkbox"/> Within 3 months of noticing symptom<br/> <input type="checkbox"/> After more than 3 months of noticing symptom</p> |

| <p>In the last 3 months, have you had the following....?<br/><i>*Please answer for each symptom*</i></p>                                                             | <p>Approximately when did the symptom start/when did you first notice it?<br/>(Please give your best guess)</p>                                                                                                                                                                                                       | <p>How long did the symptom last?</p>                                              | <p>Have you been concerned the symptom might be serious?</p>                                                                                                                                                 | <p>How much has the symptom interfered with your life?</p>                                                                                                                                                   | <p>What do you think may have caused the symptom?<br/>(Please list as many things as come to mind)</p> | <p>Approximately how long after the symptom began did you contact the GP about it?<br/>(If you are unsure, please give your best guess)</p>                                                                                                                                                                                                                                                                                                                            |
|----------------------------------------------------------------------------------------------------------------------------------------------------------------------|-----------------------------------------------------------------------------------------------------------------------------------------------------------------------------------------------------------------------------------------------------------------------------------------------------------------------|------------------------------------------------------------------------------------|--------------------------------------------------------------------------------------------------------------------------------------------------------------------------------------------------------------|--------------------------------------------------------------------------------------------------------------------------------------------------------------------------------------------------------------|--------------------------------------------------------------------------------------------------------|------------------------------------------------------------------------------------------------------------------------------------------------------------------------------------------------------------------------------------------------------------------------------------------------------------------------------------------------------------------------------------------------------------------------------------------------------------------------|
| <p><b>Persistent cough or hoarseness</b><br/><input type="checkbox"/> YES →<br/><input type="checkbox"/> NO</p>                                                      | <p><input type="checkbox"/> Less than 1 week ago<br/><input type="checkbox"/> Less than 2 weeks ago<br/><input type="checkbox"/> Less than 1 month ago<br/><input type="checkbox"/> Less than 6 weeks ago<br/><input type="checkbox"/> Less than 3 months ago<br/><input type="checkbox"/> 3 months ago or longer</p> | <p>Number of days:<br/>_____days<br/>Or:<br/><input type="checkbox"/> On-going</p> | <p><input type="checkbox"/> Not at all<br/><input type="checkbox"/> A little bit<br/><input type="checkbox"/> Moderately<br/><input type="checkbox"/> Quite a bit<br/><input type="checkbox"/> Extremely</p> | <p><input type="checkbox"/> Not at all<br/><input type="checkbox"/> A little bit<br/><input type="checkbox"/> Moderately<br/><input type="checkbox"/> Quite a bit<br/><input type="checkbox"/> Extremely</p> | <p>_____</p> <p>_____</p> <p>_____</p> <p>_____</p>                                                    | <p><input type="checkbox"/> Did not contact the GP<br/><input type="checkbox"/> Not contacted the GP yet, but plan to<br/><input type="checkbox"/> Within 1-2 weeks of noticing symptom<br/><input type="checkbox"/> Within 1 month of noticing symptom<br/><input type="checkbox"/> Within 6 weeks of noticing symptom<br/><input type="checkbox"/> Within 3 months of noticing symptom<br/><input type="checkbox"/> After more than 3 months of noticing symptom</p> |
| <p><b>Rectal bleeding (i.e. bleeding from the back passage or blood in the bowel motions)</b><br/><input type="checkbox"/> YES →<br/><input type="checkbox"/> NO</p> | <p><input type="checkbox"/> Less than 1 week ago<br/><input type="checkbox"/> Less than 2 weeks ago<br/><input type="checkbox"/> Less than 1 month ago<br/><input type="checkbox"/> Less than 6 weeks ago<br/><input type="checkbox"/> Less than 3 months ago<br/><input type="checkbox"/> 3 months ago or longer</p> | <p>Number of days:<br/>_____days<br/>Or:<br/><input type="checkbox"/> On-going</p> | <p><input type="checkbox"/> Not at all<br/><input type="checkbox"/> A little bit<br/><input type="checkbox"/> Moderately<br/><input type="checkbox"/> Quite a bit<br/><input type="checkbox"/> Extremely</p> | <p><input type="checkbox"/> Not at all<br/><input type="checkbox"/> A little bit<br/><input type="checkbox"/> Moderately<br/><input type="checkbox"/> Quite a bit<br/><input type="checkbox"/> Extremely</p> | <p>_____</p> <p>_____</p> <p>_____</p> <p>_____</p>                                                    | <p><input type="checkbox"/> Did not contact the GP<br/><input type="checkbox"/> Not contacted the GP yet, but plan to<br/><input type="checkbox"/> Within 1-2 weeks of noticing symptom<br/><input type="checkbox"/> Within 1 month of noticing symptom<br/><input type="checkbox"/> Within 6 weeks of noticing symptom<br/><input type="checkbox"/> Within 3 months of noticing symptom<br/><input type="checkbox"/> After more than 3 months of noticing symptom</p> |
| <p><b>Other unexplained bleeding</b><br/><input type="checkbox"/> YES →<br/><input type="checkbox"/> NO</p>                                                          | <p><input type="checkbox"/> Less than 1 week ago<br/><input type="checkbox"/> Less than 2 weeks ago<br/><input type="checkbox"/> Less than 1 month ago<br/><input type="checkbox"/> Less than 6 weeks ago<br/><input type="checkbox"/> Less than 3 months ago<br/><input type="checkbox"/> 3 months ago or longer</p> | <p>Number of days:<br/>_____days<br/>Or:<br/><input type="checkbox"/> On-going</p> | <p><input type="checkbox"/> Not at all<br/><input type="checkbox"/> A little bit<br/><input type="checkbox"/> Moderately<br/><input type="checkbox"/> Quite a bit<br/><input type="checkbox"/> Extremely</p> | <p><input type="checkbox"/> Not at all<br/><input type="checkbox"/> A little bit<br/><input type="checkbox"/> Moderately<br/><input type="checkbox"/> Quite a bit<br/><input type="checkbox"/> Extremely</p> | <p>_____</p> <p>_____</p> <p>_____</p> <p>_____</p>                                                    | <p><input type="checkbox"/> Did not contact the GP<br/><input type="checkbox"/> Not contacted the GP yet, but plan to<br/><input type="checkbox"/> Within 1-2 weeks of noticing symptom<br/><input type="checkbox"/> Within 1 month of noticing symptom<br/><input type="checkbox"/> Within 6 weeks of noticing symptom<br/><input type="checkbox"/> Within 3 months of noticing symptom<br/><input type="checkbox"/> After more than 3 months of noticing symptom</p> |
| <p><b>Abdominal bloating (i.e. bloating of your tummy or belly)</b><br/><input type="checkbox"/> YES →<br/><input type="checkbox"/> NO</p>                           | <p><input type="checkbox"/> Less than 1 week ago<br/><input type="checkbox"/> Less than 2 weeks ago<br/><input type="checkbox"/> Less than 1 month ago<br/><input type="checkbox"/> Less than 6 weeks ago<br/><input type="checkbox"/> Less than 3 months ago<br/><input type="checkbox"/> 3 months ago or longer</p> | <p>Number of days:<br/>_____days<br/>Or:<br/><input type="checkbox"/> On-going</p> | <p><input type="checkbox"/> Not at all<br/><input type="checkbox"/> A little bit<br/><input type="checkbox"/> Moderately<br/><input type="checkbox"/> Quite a bit<br/><input type="checkbox"/> Extremely</p> | <p><input type="checkbox"/> Not at all<br/><input type="checkbox"/> A little bit<br/><input type="checkbox"/> Moderately<br/><input type="checkbox"/> Quite a bit<br/><input type="checkbox"/> Extremely</p> | <p>_____</p> <p>_____</p> <p>_____</p> <p>_____</p>                                                    | <p><input type="checkbox"/> Did not contact the GP<br/><input type="checkbox"/> Not contacted the GP yet, but plan to<br/><input type="checkbox"/> Within 1-2 weeks of noticing symptom<br/><input type="checkbox"/> Within 1 month of noticing symptom<br/><input type="checkbox"/> Within 6 weeks of noticing symptom<br/><input type="checkbox"/> Within 3 months of noticing symptom<br/><input type="checkbox"/> After more than 3 months of noticing symptom</p> |
| <p><b>A sore that does not heal</b><br/><input type="checkbox"/> YES →<br/><input type="checkbox"/> NO</p>                                                           | <p><input type="checkbox"/> Less than 1 week ago<br/><input type="checkbox"/> Less than 2 weeks ago<br/><input type="checkbox"/> Less than 1 month ago<br/><input type="checkbox"/> Less than 6 weeks ago<br/><input type="checkbox"/> Less than 3 months ago<br/><input type="checkbox"/> 3 months ago or longer</p> | <p>Number of days:<br/>_____days<br/>Or:<br/><input type="checkbox"/> On-going</p> | <p><input type="checkbox"/> Not at all<br/><input type="checkbox"/> A little bit<br/><input type="checkbox"/> Moderately<br/><input type="checkbox"/> Quite a bit<br/><input type="checkbox"/> Extremely</p> | <p><input type="checkbox"/> Not at all<br/><input type="checkbox"/> A little bit<br/><input type="checkbox"/> Moderately<br/><input type="checkbox"/> Quite a bit<br/><input type="checkbox"/> Extremely</p> | <p>_____</p> <p>_____</p> <p>_____</p> <p>_____</p>                                                    | <p><input type="checkbox"/> Did not contact the GP<br/><input type="checkbox"/> Not contacted the GP yet, but plan to<br/><input type="checkbox"/> Within 1-2 weeks of noticing symptom<br/><input type="checkbox"/> Within 1 month of noticing symptom<br/><input type="checkbox"/> Within 6 weeks of noticing symptom<br/><input type="checkbox"/> Within 3 months of noticing symptom<br/><input type="checkbox"/> After more than 3 months of noticing symptom</p> |

PLEASE NOTE: IF YOU HAVE SYMPTOMS PERSISTENTLY, YOU SHOULD GO TO YOUR GP FOR ADVICE

## THE NEXT FEW QUESTIONS ARE ABOUT YOUR GENERAL HEALTH

Compared with other people your age, would you say your health is...?

Poor

Fair

Good

Very good

Excellent

Do you have any illnesses or conditions that affect your daily life?

Yes

No

Do you have a diagnosis of any of the following conditions/illnesses? *\*Please tick all that apply*

Arthritis

Cholesterol problems

High blood pressure

Cancer

Depression

Kidney problems

Circulation problems

Diabetes

Stroke

Chest problems

Heart problems

Other (please specify)

\_\_\_\_\_

Have you had any of the following investigations/tests in the LAST TWO YEARS? (excluding investigations performed after injuries) *\*Please tick all that apply*

Ultrasound scan

Colonoscopy/Sigmoidoscopy

CT or MRI scan

Biopsy

Endoscopy

PSA test

Mammogram

Other test (please specify)

\_\_\_\_\_

Chest X-Ray

Have not had any investigations/tests

**If you have, approximately how many months ago was your most recent investigation/test?**

\_\_\_\_\_ months ago

*If more than once, please refer to the LAST time you had any of the above tests*

On a day-to-day basis, how much do you worry about ...

Not at all

A little

Moderately

Quite a bit

A lot

Heart Disease






Cancer






Alzheimer's Disease

## THE NEXT QUESTIONS ARE ABOUT YOUR KNOWLEDGE OF SOME ILLNESSES

In the table below are a number of symptoms. For each symptom, please tick as many illnesses as you think might apply.

|                                                                                     | Heart disease            | Cancer                   | Asthma                   | Don't know               |
|-------------------------------------------------------------------------------------|--------------------------|--------------------------|--------------------------|--------------------------|
| Chest pain                                                                          | <input type="checkbox"/> | <input type="checkbox"/> | <input type="checkbox"/> | <input type="checkbox"/> |
| Unexplained lump                                                                    | <input type="checkbox"/> | <input type="checkbox"/> | <input type="checkbox"/> | <input type="checkbox"/> |
| Unexplained weight loss                                                             | <input type="checkbox"/> | <input type="checkbox"/> | <input type="checkbox"/> | <input type="checkbox"/> |
| Persistent change in bowel habits                                                   | <input type="checkbox"/> | <input type="checkbox"/> | <input type="checkbox"/> | <input type="checkbox"/> |
| Blood in urine                                                                      | <input type="checkbox"/> | <input type="checkbox"/> | <input type="checkbox"/> | <input type="checkbox"/> |
| Persistent change in bladder habits                                                 | <input type="checkbox"/> | <input type="checkbox"/> | <input type="checkbox"/> | <input type="checkbox"/> |
| Shortness of breath                                                                 | <input type="checkbox"/> | <input type="checkbox"/> | <input type="checkbox"/> | <input type="checkbox"/> |
| Persistent unexplained pain                                                         | <input type="checkbox"/> | <input type="checkbox"/> | <input type="checkbox"/> | <input type="checkbox"/> |
| Persistent difficulty swallowing                                                    | <input type="checkbox"/> | <input type="checkbox"/> | <input type="checkbox"/> | <input type="checkbox"/> |
| Change in the appearance of a mole or a new mole                                    | <input type="checkbox"/> | <input type="checkbox"/> | <input type="checkbox"/> | <input type="checkbox"/> |
| Rectal bleeding (i.e. bleeding from the back passage or blood in the bowel motions) | <input type="checkbox"/> | <input type="checkbox"/> | <input type="checkbox"/> | <input type="checkbox"/> |
| Other unexplained bleeding                                                          | <input type="checkbox"/> | <input type="checkbox"/> | <input type="checkbox"/> | <input type="checkbox"/> |
| Any breast changes                                                                  | <input type="checkbox"/> | <input type="checkbox"/> | <input type="checkbox"/> | <input type="checkbox"/> |
| Abdominal bloating (i.e. bloating of your tummy or belly)                           | <input type="checkbox"/> | <input type="checkbox"/> | <input type="checkbox"/> | <input type="checkbox"/> |
| Feeling your heart pound or race                                                    | <input type="checkbox"/> | <input type="checkbox"/> | <input type="checkbox"/> | <input type="checkbox"/> |
| Persistent cough or hoarseness                                                      | <input type="checkbox"/> | <input type="checkbox"/> | <input type="checkbox"/> | <input type="checkbox"/> |
| A sore that does not heal                                                           | <input type="checkbox"/> | <input type="checkbox"/> | <input type="checkbox"/> | <input type="checkbox"/> |

How much attention do you pay to information about health or medical topics on TV, radio, magazines or newspapers?

A lot

Some

A little

None at all

I avoid them

|                                                                               | Very difficult           | Fairly difficult         | Fairly easy              | Very easy                | Don't know               |
|-------------------------------------------------------------------------------|--------------------------|--------------------------|--------------------------|--------------------------|--------------------------|
| How easy do you find it to understand what the GP says to you?                | <input type="checkbox"/> | <input type="checkbox"/> | <input type="checkbox"/> | <input type="checkbox"/> | <input type="checkbox"/> |
| How easy do you find it to understand the leaflets that come with medication? | <input type="checkbox"/> | <input type="checkbox"/> | <input type="checkbox"/> | <input type="checkbox"/> | <input type="checkbox"/> |
| How easy do you find it to follow the instructions on medication?             | <input type="checkbox"/> | <input type="checkbox"/> | <input type="checkbox"/> | <input type="checkbox"/> | <input type="checkbox"/> |

At the moment, the NHS has screening programmes for breast and cervical cancer for women, and bowel cancer for men and women. Have you ever participated in any of the following programmes? If yes, please state how many times you have participated in each.

| Name of programme                                                                                    | Have you participated in this programme?                                                         | If yes, how many times?                                                                                                                              |
|------------------------------------------------------------------------------------------------------|--------------------------------------------------------------------------------------------------|------------------------------------------------------------------------------------------------------------------------------------------------------|
| Bowel cancer screening (sometimes known as the faecal occult blood test, FOB test or stool kit test) | Yes <input type="checkbox"/><br>No <input type="checkbox"/><br>Not sure <input type="checkbox"/> | Once <input type="checkbox"/><br>2-3 times <input type="checkbox"/><br>4 times or more <input type="checkbox"/><br>Not sure <input type="checkbox"/> |
| Breast cancer screening (sometimes known as mammography)                                             | Yes <input type="checkbox"/><br>No <input type="checkbox"/><br>Not sure <input type="checkbox"/> | Once <input type="checkbox"/><br>2-3 times <input type="checkbox"/><br>4 times or more <input type="checkbox"/><br>Not sure <input type="checkbox"/> |
| Cervical cancer screening (sometimes known as PAP smear)                                             | Yes <input type="checkbox"/><br>No <input type="checkbox"/><br>Not sure <input type="checkbox"/> | Once <input type="checkbox"/><br>2-3 times <input type="checkbox"/><br>4 times or more <input type="checkbox"/><br>Not sure <input type="checkbox"/> |



# FINALLY, A FEW QUESTIONS ABOUT YOU TO HELP US ANALYSE THE RESULTS OF THE SURVEY

Please enter today's date:

|                                    |                                                                                                   |                                 |
|------------------------------------|---------------------------------------------------------------------------------------------------|---------------------------------|
| <b>Are you:</b>                    | Male <input type="checkbox"/>                                                                     | Female <input type="checkbox"/> |
| <b>What is your date of birth?</b> | <input type="text" value="dd"/> <input type="text" value="mm"/> <input type="text" value="yyyy"/> |                                 |

| What is your ethnic group?                      |                                      |                                          |                                                  |                                                |
|-------------------------------------------------|--------------------------------------|------------------------------------------|--------------------------------------------------|------------------------------------------------|
| White British <input type="checkbox"/>          | Indian <input type="checkbox"/>      | Black Caribbean <input type="checkbox"/> | Chinese <input type="checkbox"/>                 | White & Black African <input type="checkbox"/> |
| White Irish <input type="checkbox"/>            | Pakistani <input type="checkbox"/>   | Black African <input type="checkbox"/>   | White & Black Caribbean <input type="checkbox"/> | Prefer not to say <input type="checkbox"/>     |
| Other White background <input type="checkbox"/> | Bangladeshi <input type="checkbox"/> | White Asian <input type="checkbox"/>     | Other (please specify) <input type="checkbox"/>  |                                                |
| .....                                           |                                      |                                          |                                                  |                                                |

| What is the highest level of education qualification you have obtained?    |                                                                       |
|----------------------------------------------------------------------------|-----------------------------------------------------------------------|
| Degree or higher degree <input type="checkbox"/>                           | O Level/GCSE ('Standard grades' in Scotland) <input type="checkbox"/> |
| Higher education qualification below degree level <input type="checkbox"/> | No formal qualifications <input type="checkbox"/>                     |
| A-levels ('Highers' in Scotland) <input type="checkbox"/>                  | Other (please specify) <input type="checkbox"/>                       |
| ONC/BTEC <input type="checkbox"/>                                          | _____                                                                 |

| What is your marital status? |                             |                          |                          |                          |
|------------------------------|-----------------------------|--------------------------|--------------------------|--------------------------|
| Single/never married         | Married/living with partner | Civil partnership        | Divorced/Separated       | Widowed                  |
| <input type="checkbox"/>     | <input type="checkbox"/>    | <input type="checkbox"/> | <input type="checkbox"/> | <input type="checkbox"/> |

| Does your household own a car or van? |                          |                          |
|---------------------------------------|--------------------------|--------------------------|
| No                                    | Yes, one                 | Yes, two or more         |
| <input type="checkbox"/>              | <input type="checkbox"/> | <input type="checkbox"/> |

| Approximately how many days a week do you drink alcohol?<br>(If unknown, please give your best guess) | Every day                | Most days                | 1-2 days a week          | Less than once a week    |
|-------------------------------------------------------------------------------------------------------|--------------------------|--------------------------|--------------------------|--------------------------|
|                                                                                                       | <input type="checkbox"/> | <input type="checkbox"/> | <input type="checkbox"/> | <input type="checkbox"/> |

**What are your current living arrangements?**

|                          |                          |                                               |                          |                                          |
|--------------------------|--------------------------|-----------------------------------------------|--------------------------|------------------------------------------|
| Home owned outright      | Home owned with mortgage | Rent from Local Authority/Housing Association | Rent privately           | Other (e.g. living with family /friends) |
| <input type="checkbox"/> | <input type="checkbox"/> | <input type="checkbox"/>                      | <input type="checkbox"/> | <input type="checkbox"/>                 |

**What is your postcode?\***

|                      |                      |                      |                      |                      |                      |                      |                      |
|----------------------|----------------------|----------------------|----------------------|----------------------|----------------------|----------------------|----------------------|
| <input type="text"/> | <input type="text"/> | <input type="text"/> | <input type="text"/> | <input type="text"/> | <input type="text"/> | <input type="text"/> | <input type="text"/> |
|----------------------|----------------------|----------------------|----------------------|----------------------|----------------------|----------------------|----------------------|

*\*This information will not be used to contact you and will not be shared with any third parties. It is for research purposes only.*

**What is your current employment status?**

|                    |                          |                             |                          |
|--------------------|--------------------------|-----------------------------|--------------------------|
| Employed full-time | <input type="checkbox"/> | Full-time homemaker         | <input type="checkbox"/> |
| Employed part-time | <input type="checkbox"/> | Retired                     | <input type="checkbox"/> |
| Unemployed         | <input type="checkbox"/> | Studying                    | <input type="checkbox"/> |
| Self-employed      | <input type="checkbox"/> | Disabled or too ill to work | <input type="checkbox"/> |

**How tall are you?**

(If unknown, please give your best guess)

\_\_\_\_\_ cm OR \_\_\_\_\_ feet \_\_\_\_\_ inches

**How much do you weigh?**

(If unknown, please give your best guess)

\_\_\_\_\_ Kg OR \_\_\_\_\_ stone \_\_\_\_\_ pounds

**Do you smoke? (please tick the ONE box below that best describes you)**

Yes, I am a current smoker

Yes, I smoke occasionally

Not now, but I used to smoke

No, I have never smoked

**Have any friends or family members that are close to you ever been diagnosed with the following illnesses?**

*\*Please tick the box next to all that apply*

|               | Parent/brother/sister/child | Other family member      | Close friend             | No/not applicable        |
|---------------|-----------------------------|--------------------------|--------------------------|--------------------------|
| Heart disease | <input type="checkbox"/>    | <input type="checkbox"/> | <input type="checkbox"/> | <input type="checkbox"/> |
| Cancer        | <input type="checkbox"/>    | <input type="checkbox"/> | <input type="checkbox"/> | <input type="checkbox"/> |
| Asthma        | <input type="checkbox"/>    | <input type="checkbox"/> | <input type="checkbox"/> | <input type="checkbox"/> |

## FURTHER INFORMATION

In approximately three months, we are planning to contact a few people to tell us more about their experiences. Would you be prepared to be contacted again? Yes  No

If yes, please provide your details below (this information will be treated in the strictest confidence and will be kept separately from your questionnaire):

Name \_\_\_\_\_

Address \_\_\_\_\_

\_\_\_\_\_

\_\_\_\_\_

Email \_\_\_\_\_

Telephone \_\_\_\_\_

If you would like to receive a summary of the results from this survey when it is completed, please fill in your contact details below.

***Information provided here will not be used to contact you about taking part in research.***

Name \_\_\_\_\_

Address \_\_\_\_\_

\_\_\_\_\_

\_\_\_\_\_

Email \_\_\_\_\_

### **IMPORTANT:**

**IF YOU ARE WORRIED ABOUT ANY SYMPTOMS OR ARE EXPERIENCING PERSISTENT SYMPTOMS, GO TO THE GP FOR ADVICE**

Thank you for completing this survey.
